# Supplementary material
Source: PubMed Central journal article supplement (PMC4410830)
Supplement: supp_cwv001_cwv001supp.pdf [file supp_cwv001_cwv001supp.pdf]

**Supplementary Figure 1.** Amino acid sequence alignment of domain 15 from different species shows the conservation of critical residues. All species show conservation of the cysteine (yellow) residue position as well as three out of the four essential carbohydrate-binding residues (red). The proposed linkage sensing Tyr residue is shown boxed in red. The newly identified critical Arg residue is shaded in cyan. (H.sapiens, NP\_000867.2; P.troglodytes, XP\_003311618.2; M.mulatta, XP\_002804004.1; C.lupus, NP\_001116074.1; B.taurus, NP\_776777.1; M.musculus, NP\_034645.2; R.norvegicus, NP\_036888.1; G.gallus, NP\_990301.1; D.rerio, NP\_001034716.1)

**Supplementary Figure 1**

|                |                                                                                               |
|----------------|-----------------------------------------------------------------------------------------------|
| B. taurus      | VKPQEVQVMNGTITNPANGRSFSLGDIYFKRFSASGDVRTNG-DRIYIEIQLSSITGSSSPACSGASICQRKANDQHF SRKVGTSNQTRY   |
| H. sapiens     | VKPQEVQVMNGTITNPINGKSFSLGDIYFKLFRASGDMRTNG-DNYLYEIQLSSITSSRN PACSGANICQVKPNDQHF SRKVGTS DKTKY |
| P. troglodytes | VKPQEVQVMNGTITNPINGKSFSLGDIYFKLFRASGDMRTNG-DNYLYEIQLSSITSSRN PACSGANICQVKPNDQHF SRKVGTS DKTKY |
| M. mulatta     | VKPQEVQVMNGTITNPINGKSFSLGDIYFKLFRASGDMRTNG-DNYLYEIQLSSITSSRN PACSGANICQVKPDDQHF SRKVGTS DKTKY |
| C. lupus       | VKPQEVQVMNGTITNPINGKSFSLGDIYFKLFSASGDMRTNG-DKYLEIQLSSITSSRN PACSGANICQVKPNDQHF SRKVGTS DKTKY  |
| M. musculus    | VRPQEVTMVNGTLTNPVTGKSFSLGEIYFKLFSASGDMRTNG-DNYLYEIQLSSITSSYPACAGANICQVKPNDQHF SRKVGTS DMTKY   |
| R. novegicus   | VRPQEVNMVNGTLTNPVTGKSFSLGEIYFKLFSASGDMRSNG-DNYLYEIQLSSISSSN PACSGANICQVKPNDQHF SRKVGTS DMTKY  |
| G. gallus      | VKPQEVVNGTIVNPATGKNFSLGDVYKLYMASGDI RTNG-DQYVVEIQLSGITNSSFP ECSEANICQVKTSERRF-RKIGWAKKAKY     |
| D. rerio       | VKQEEVEMVNGTIKVPKTGATFSLGALYYRLHNATGDIRANG-DRIYIYHIQLSGITDSSISMCLGANICQVKIN-DSYRRKIGSSSKAKY   |
| X. tropicalis  | SIPKPAEMKNGILSLD-DGVNVNLTDIYFKSYNATGDIRSNGKDSYVVEIQLSGKADSRVQECKDASVCQIKLNGD-FKRPGVSVRNVKY    |

  

|                |                                                                                              |
|----------------|----------------------------------------------------------------------------------------------|
| B. taurus      | YVQDGDLDVVF TSSSKCGKDKTKSVSSTIFFHCDPLVKDGIPF FSHETADCOYLF SWHTSAVCP LG----AGFDEE IAGDDAQ-E   |
| H. sapiens     | YLQDGDLDVVF ASSSKCGKDKTKSVSSTIFFHCDPLVEDGIPF FSHETADCOYLF SWYTSAVCP LG----VGF DSENPGDDGQ-M   |
| P. troglodytes | YLQDGDLDVVF ASSSKCGKDKTKSVSSTIFFHCDPLVEDGIPF FSHETADCOYLF SWYTSAVCP LG----VGF DSENPGDDGQ-M   |
| M. mulatta     | YLQDGDLDVVF ASSSKCGKDKTKSVSSTIFFHCDPLVEDGIPF FSHETADCOYLF SWYTSAVCP LG----VGF DNE NP GDDEQ-V |
| C. lupus       | YIQDGDLDVVF ASSSKCGKDKTKSVSSTIFFHCDPLVKDGIPF FSHETADCOYLF SWYTSAVCP LG----VDLGD NAGEDTQ-E    |
| M. musculus    | YVQDGDLDVVF TSSSKCGKDKTKSVSSTIFFHCDPLVKDGIPF FSHETADCOYLF SWYTSAVCP LG----VDFEDESAGP----E    |
| R. novegicus   | YVQDGDLDVVF TSSSTCGKDKTKSVSSTIFFHCDPLVKDGVPF FSHETADCOYLF SWYTSAVCP LG----VDFDDENAV P----E   |
| G. gallus      | YVEDDDL DVIFSSDSRCGDKSKFVSSS IFFHCSPHVQEGIPF FLHETADCOYLF TWYTSAVCP LISTIAPGIHGGQSDQEAQ-V    |
| D. rerio       | YIKGGNLDLV PSESVCGRDKTKTVSSAILFHC SPTAGEGIPF FLETTDCOYLF VVHTSTVCEFISS--SSIDSTDGGE----E      |
| X. tropicalis  | YINDDDLDAVFTSDSQCGKDKSKNATATILFYCSQIVGEGRPF FPHETTDCOYLF TWYTSAVCP LVPNGNP GSEPNYQGLSGRSQ    |
